# Supplementary material for: Spontaneous origin from human embryonic stem cells of liver cells displaying conjoint meso-endodermal phenotype with hepatic functions
Source: Oxford University Press journal article supplement (doi:10.1242/jcs.095372), 2012-02-21
Supplement: jcs095372tables1-s5.pdf [file jcs095372tables1-s5.pdf]

**Table S1. Gene expression levels from Affymetrix microarray data**

| <b>Gene</b> | <b>UniGene</b> | <b>GeneBank</b> | <b>hESC</b> | <b>hESC-MEC</b> | <b>FH-Ep-P3</b> | <b>FH-Ep-PP</b> |
|-------------|----------------|-----------------|-------------|-----------------|-----------------|-----------------|
| OCT4        | Hs.249184      | NM_002701       | 10.8        | 6.8             | 5.4             | 5.5             |
| NANOG       | Hs.661360      | NM_024865       | 9.0         | 5.8             | 5.2             | 5.4             |
| SOX2        | Hs.518438      | NM_003106       | 9.6         | 5.6             | 5.1             | 5.0             |
| KLF4        | Hs.376206      | NM_004235       | 6.7         | 9.6             | 8.9             | 8.0             |
| SOX17       | Hs.98367       | NM_022454       | 4.7         | 5.1             | 5.7             | 4.9             |
| HNF3a       | Hs.163484      | NM_004496       | 4.4         | 4.2             | 3.8             | 4.9             |
| HNF1a       | Hs.654455      | NM_000545       | 6.7         | 6.8             | 6.6             | 6.9             |
| HNF1b       | Hs.191144      | NM_000458       | 6.4         | 6.6             | 6.4             | 7.0             |
| HNF4a       | Hs.116462      | NM_178849       | 6.5         | 6.7             | 5.6             | 6.3             |
| HNF6        | Hs.658573      | NM_004498       | 6.0         | 6.2             | 5.1             | 5.3             |
| CEBPA       | Hs.699463      | NM_004364       | 7.9         | 7.4             | 6.5             | 9.4             |
| GATA4       | Hs.243987      | NM_002052       | 6.2         | 6.6             | 6.4             | 6.3             |
| GATA6       | Hs.514746      | NM_005257       | 5.3         | 7.6             | 7.8             | 6.4             |
| TGFBR1      | Hs.494622      | NM_004612       | 8.0         | 8.0             | 8.6             | 6.8             |
| TGFBR2      | Hs.82028       | NM_003242       | 6.1         | 8.5             | 7.9             | 6.8             |
| SMAD4       | Hs.75862       | NM_005359       | 6.6         | 6.5             | 5.7             | 5.8             |
| AFP         | Hs.518808      | NM_001134       | 6.4         | 7.0             | 5.5             | 13.5            |
| ALBUMIN     | Hs.418167      | NM_000477       | 4.8         | 4.5             | 4.3             | 11.7            |
| ASGR1       | Hs.12056       | NM_001671       | 7.5         | 6.2             | 5.6             | 11.2            |
| SERPINA1    | Hs.525557      | NM_000295       | 5.8         | 6.1             | 5.1             | 10.8            |
| VIMENTIN    | Hs.642813      | NM_003380       | 8.1         | 10.8            | 10.0            | 7.4             |
| G6PC        | Hs.212293      | NM_000151       | 6.1         | 5.0             | 4.3             | 6.7             |
| CK19        | Hs.654568      | NM_002276       | 6.9         | 6.1             | 5.3             | 5.2             |
| CK8         | Hs.533782      | NM_002273       | 8.8         | 6.7             | 8.0             | 8.4             |
| TAT         | Hs.161640      | NM_000353       | 6.8         | 6.6             | 5.6             | 6.0             |
| APOE        | Hs.654439      | NM_000041       | 11.4        | 8.1             | 7.4             | 12.0            |
| TDO2        | Hs.183671      | NM_005651       | 4.9         | 5.3             | 4.3             | 7.8             |
| TTR         | Hs.427202      | NM_000371       | 7.8         | 8.5             | 7.0             | 13.3            |
| CDH1        | Hs.461086      | NM_004360       | 9.5         | 4.4             | 4.4             | 7.7             |
| CYP3A4      | Hs.654391      | NM_017460       | 7.0         | 6.8             | 6.0             | 8.1             |
| CYP2C9      | Hs.282624      | NM_000771       | 6.3         | 6.4             | 5.4             | 6.1             |
| CYP7A1      | Hs.1644        | NM_000780       | 3.5         | 3.5             | 3.1             | 3.0             |
| BRACHYURY   | Hs.38945       | NM_003181       | 8.0         | 8.3             | 6.7             | 6.8             |
| GAPDH       | Hs.544577      | NM_002046       | 13.8        | 14.1            | 13.4            | 12.5            |

**Table S2. Normalized gene expression relative to GAPDH from Affymetrix microarray data**

| Gene      | UniGene   | GeneBank  | hESC/<br>hESC-MEC | FH-Ep-P3/<br>hESC-MEC | FH-Ep-PP/<br>hESC-MEC |
|-----------|-----------|-----------|-------------------|-----------------------|-----------------------|
| OCT4      | Hs.249184 | NM_002701 | 1.6               | 0.8                   | 0.9                   |
| NANOG     | Hs.661360 | NM_024865 | 1.6               | 1.0                   | 1.1                   |
| SOX2      | Hs.518438 | NM_003106 | 1.8               | 1.0                   | 1.0                   |
| KLF4      | Hs.376206 | NM_004235 | 0.7               | 1.0                   | 0.9                   |
| SOX17     | Hs.98367  | NM_022454 | 1.0               | 1.2                   | 1.1                   |
| HNF3a     | Hs.163484 | NM_004496 | 1.0               | 1.0                   | 1.3                   |
| HNF1a     | Hs.654455 | NM_000545 | 1.0               | 1.0                   | 1.1                   |
| HNF1b     | Hs.191144 | NM_000458 | 1.0               | 1.0                   | 1.2                   |
| HNF4a     | Hs.116462 | NM_178849 | 1.0               | 0.9                   | 1.1                   |
| HNF6      | Hs.658573 | NM_004498 | 1.0               | 0.9                   | 1.0                   |
| CEBPA     | Hs.699463 | NM_004364 | 1.0               | 0.9                   | 1.4                   |
| GATA4     | Hs.243987 | NM_002052 | 1.0               | 1.0                   | 1.1                   |
| GATA6     | Hs.514746 | NM_005257 | 0.7               | 1.0                   | 1.0                   |
| TGFBR1    | Hs.494622 | NM_004612 | 1.0               | 1.1                   | 1.0                   |
| TGFBR2    | Hs.82028  | NM_003242 | 0.7               | 1.0                   | 0.9                   |
| SMAD4     | Hs.75862  | NM_005359 | 1.0               | 0.9                   | 1.0                   |
| AFP       | Hs.518808 | NM_001134 | 0.9               | 0.8                   | 2.2                   |
| ALBUMIN   | Hs.418167 | NM_000477 | 1.1               | 1.0                   | 2.9                   |
| ASGR1     | Hs.12056  | NM_001671 | 1.3               | 0.9                   | 2.1                   |
| SERPINA1  | Hs.525557 | NM_000295 | 1.0               | 0.9                   | 1.0                   |
| VIMENTIN  | Hs.642813 | NM_003380 | 0.8               | 1.0                   | 0.8                   |
| G6PC      | Hs.212293 | NM_000151 | 1.3               | 0.9                   | 1.5                   |
| CK19      | Hs.654568 | NM_002276 | 1.2               | 0.9                   | 1.0                   |
| CK8       | Hs.533782 | NM_002273 | 1.3               | 1.3                   | 1.4                   |
| TAT       | Hs.161640 | NM_000353 | 1.0               | 0.9                   | 1.0                   |
| APOE      | Hs.654439 | NM_000041 | 1.4               | 1.0                   | 1.7                   |
| TDO2      | Hs.183671 | NM_005651 | 0.9               | 0.8                   | 1.6                   |
| TTR       | Hs.427202 | NM_000371 | 0.9               | 0.9                   | 1.8                   |
| CDH1      | Hs.461086 | NM_004360 | 2.2               | 1.1                   | 2.0                   |
| CYP3A4    | Hs.654391 | NM_017460 | 1.0               | 0.9                   | 1.3                   |
| CYP2C9    | Hs.282624 | NM_000771 | 1.0               | 0.9                   | 1.1                   |
| CYP7A1    | Hs.1644   | NM_000780 | 1.0               | 0.9                   | 1.0                   |
| BRACHYURY | Hs.38945  | NM_003181 | 1.0               | 0.9                   | 0.9                   |
| GAPDH     | Hs.544577 | NM_002046 | 1.0               | 1.0                   | 1.0                   |

**Table S3. Efficacy of cell culture manipulations to advance hepatic differentiation in hESC-MEC**

| Gene or protein | Untreated controls | Activin A, aFGF, HGF, OSM, DKK-1, $\gamma$ -Secretase, Trichostatin A | Activin A, aFGF, HGF, OSM, DKK-1, $\gamma$ -Secretase | Activin A, aFGF, HGF, OSM, DKK-1 | Activin A, aFGF, HGF, OSM, $\gamma$ -Secretase | Activin A, aFGF, HGF, OSM, Trichostatin A | Activin A, aFGF, HGF, OSM, DKK-1, Trichostatin A | Activin A, aFGF, HGF, OSM, $\gamma$ -Secretase, Trichostatin A | HGF, OSM |
|-----------------|--------------------|-----------------------------------------------------------------------|-------------------------------------------------------|----------------------------------|------------------------------------------------|-------------------------------------------|--------------------------------------------------|----------------------------------------------------------------|----------|
| †Alb            | +                  | +                                                                     | +                                                     | +                                | +                                              | +                                         | +                                                | +                                                              | +        |
| †AFP            | -                  | -                                                                     | -                                                     | -                                | -                                              | -                                         | -                                                | -                                                              | -        |
| †CK19           | +                  | +                                                                     | +                                                     | +                                | +                                              | +                                         | +                                                | +                                                              | +        |
| †Vim            | +                  | +                                                                     | +                                                     | +                                | +                                              | +                                         | +                                                | +                                                              | +        |
| † $\alpha$ SMA  | +                  | +                                                                     | +                                                     | +                                | +                                              | +                                         | +                                                | +                                                              | +        |
| *Glycogen       | +                  | +                                                                     | ++                                                    | ++                               | +                                              | +                                         | ++                                               | +                                                              | +        |
| *DPPIV          | +                  | -                                                                     | -                                                     | -                                | -                                              | +                                         | -                                                | -                                                              | +        |
| *GGT            | +                  | -                                                                     | -                                                     | -                                | +                                              | ++                                        | ++                                               | -                                                              | +        |

Abbreviations: aFGF, acidic fibroblast growth factor; HGF, hepatocyte growth factor; OSM, oncostatin M; DKK-1, dickkopf-1; Alb, albumin; AFP, alpha-fetoprotein; CK19, cytokeratin 19; Vim, vimentin;  $\alpha$ SMA, alpha-smooth muscle actin.

†RT-PCR; \*cytochemical staining. Gene expression graded from absent (-) to maximum of 3+

Supplementary Table 4

Gene expression expressed in fold of healthy NOD/SCID mice after ALF induced by Rif-Phen-MCT with either sham-treatment or transplantation of hESC-MEC

| Gene description                                       | Gene Symbol | Sham-3d | Sham-7d | hESC-MEC 3d | hESC-MEC 7d |
|--------------------------------------------------------|-------------|---------|---------|-------------|-------------|
| <b>Oxidative or Metabolic Stress</b>                   |             |         |         |             |             |
| Crystallin, alpha B                                    | Cryab       | -1.2    | 1.6     | 1.1         | 1.1         |
| Cytochrome P450, family 1, subfamily a, polypeptide 1  | Cyp1a1      | -3.7    | -4.9    | -2.3        | -2.0        |
| Cytochrome P450, family 1, subfamily b, polypeptide 1  | Cyp1b1      | -3.4    | 1.5     | -2.6        | -1.5        |
| Cytochrome P450, family 2, subfamily a, polypeptide 5  | Cyp2a5      | -6.7    | -5.1    | -1.6        | -4.7        |
| Cytochrome P450, family 2, subfamily b, polypeptide 10 | Cyp2b10     | -1.2    | 1.1     | -1.7        | -1.0        |
| Cytochrome P450, family 2, subfamily b, polypeptide 9  | Cyp2b9      | -7.3    | -7.2    | -5.0        | -12.8       |
| Cytochrome P450, family 2, subfamily c, polypeptide 29 | Cyp2c29     | -46.3   | -106.9  | -6.8        | -3.6        |
| Cytochrome P450, family 3, subfamily a, polypeptide 11 | Cyp3a11     | -13.8   | -27.7   | -21.5       | -6.3        |
| Cytochrome P450, family 4, subfamily a, polypeptide 10 | Cyp4a10     | 1.6     | -5.9    | -7.9        | -8.9        |
| Cytochrome P450, family 4, subfamily a, polypeptide 14 | Cyp4a14     | 7.8     | -2.0    | -7.8        | -58.7       |
| Cytochrome P450, family 7, subfamily a, polypeptide 1  | Cyp7a1      | -32.9   | -100.2  | -15.4       | -2.2        |
| Epoxide hydrolase 2, cytoplasmic                       | Ephx2       | -4.1    | -10.4   | -3.6        | -2.9        |
| Flavin containing monooxygenase 1                      | Fmo1        | -15.6   | -2.3    | -1.1        | -1.0        |
| Flavin containing monooxygenase 4                      | Fmo4        | -1.2    | -2.0    | 1.0         | 1.1         |
| Flavin containing monooxygenase 5                      | Fmo5        | 1.7     | -1.3    | -1.1        | -1.1        |
| Glutathione peroxidase 1                               | Gpx1        | -3.2    | -3.1    | -1.4        | -1.3        |
| Glutathione peroxidase 2                               | Gpx2        | -1.6    | -1.1    | -1.9        | 1.3         |
| Glutathione reductase                                  | Gsr         | -1.4    | -1.4    | -1.4        | -1.2        |
| Glutathione S-transferase, mu 1                        | Gstm1       | -3.8    | -10.6   | -4.2        | -1.6        |
| Glutathione S-transferase, mu 3                        | Gstm3       | -3.9    | -5.8    | -3.2        | 1.2         |
| Heme oxygenase (decycling) 1                           | Hmox1       | 1.1     | 3.5     | 1.1         | 1.0         |
| Heme oxygenase (decycling) 2                           | Hmox2       | -1.2    | -1.6    | -1.2        | -1.1        |
| Metallothionein 2                                      | Mt2         | 5.7     | 7.8     | 4.9         | 4.0         |
| Polymerase (RNA) II (DNA directed) polypeptide K       | Polr2k      | -1.5    | -1.2    | -1.2        | -1.1        |
| P450 (cytochrome) oxidoreductase                       | Por         | -1.7    | -5.9    | -1.2        | -2.0        |
| Superoxide dismutase 1, soluble                        | Sod1        | -2.7    | -3.6    | -1.9        | -1.7        |
| Superoxide dismutase 2, mitochondrial                  | Sod2        | -4.4    | -5.4    | -1.4        | -1.5        |
| <b>Heat Shock</b>                                      |             |         |         |             |             |
| DnaJ (Hsp40) homolog, subfamily A, member 1            | Dnaja1      | -1.9    | -2.8    | -1.0        | -1.2        |
| Heat shock factor 1                                    | Hsf1        | -1.4    | -1.7    | -1.2        | -1.0        |
| Heat shock protein 1B                                  | Hspa1b      | -1.9    | -1.1    | -1.0        | -1.9        |
| Heat shock protein 1-like                              | Hspa1l      | -2.8    | -4.0    | -1.9        | -1.6        |
| Heat shock protein 4                                   | Hspa4       | -1.5    | -3.3    | 1.3         | 1.2         |
| Heat shock protein 5                                   | Hspa5       | 1.9     | 1.5     | 2.5         | 1.9         |
| Heat shock protein 8                                   | Hspa8       | -1.0    | -1.2    | 1.8         | 1.3         |
| Heat shock protein 1                                   | Hspb1       | -1.2    | 1.8     | -1.2        | -1.5        |
| Heat shock protein 1 (chaperonin)                      | Hspd1       | -1.6    | -2.4    | -1.3        | -1.1        |
| Heat shock protein 1 (chaperonin 10)                   | Hspe1       | -1.7    | -1.7    | -1.1        | -1.1        |
| <b>Proliferation and Carcinogenesis</b>                |             |         |         |             |             |
| Colony stimulating factor 2 (granulocyte-macrophage)   | Csf2        | -1.2    | 2.6     | 1.0         | -1.0        |
| Cyclin C                                               | Ccnc        | -1.7    | -1.7    | 1.0         | 1.0         |

|                                                                                       |          |       |       |      |      |
|---------------------------------------------------------------------------------------|----------|-------|-------|------|------|
| Cyclin D1                                                                             | Ccnd1    | -1.1  | 1.8   | 2.9  | 3.4  |
| Cyclin G1                                                                             | Ccng1    | 1.4   | 2.4   | 1.7  | 1.7  |
| E2F transcription factor 1                                                            | E2f1     | -1.0  | 2.2   | 2.0  | 2.3  |
| Early growth response 1                                                               | Egr1     | 4.2   | 15.3  | 1.3  | -1.5 |
| Proliferating cell nuclear antigen                                                    | Pcna     | -1.3  | 1.4   | 1.1  | 1.4  |
| <b>Growth Arrest and Senescence</b>                                                   |          |       |       |      |      |
| Cyclin-dependent kinase inhibitor 1A (P21)                                            | Cdkn1a   | 105.0 | 92.0  | 45.2 | 40.6 |
| DNA-damage inducible transcript 3                                                     | Ddit3    | 1.2   | 3.9   | 2.0  | -1.0 |
| Growth arrest and DNA-damage-inducible 45 alpha                                       | Gadd45a  | -3.1  | 1.6   | -1.6 | -2.8 |
| Insulin-like growth factor binding protein 6                                          | Igfbp6   | -10.2 | -3.5  | -2.9 | -1.7 |
| Transformed mouse 3T3 cell double minute 2                                            | Mdm2     | -1.0  | 1.8   | 1.5  | 1.4  |
| Transformation related protein 53                                                     | Trp53    | -1.3  | 1.3   | -1.0 | 1.1  |
| <b>Inflammation</b>                                                                   |          |       |       |      |      |
| Chemokine (C-C motif) ligand 21b                                                      | Ccl21b   | -5.0  | -16.6 | -2.3 | -5.8 |
| Chemokine (C-C motif) ligand 3                                                        | Ccl3     | 5.4   | 30.7  | 6.3  | 3.4  |
| Chemokine (C-C motif) ligand 4                                                        | Ccl4     | 3.4   | 21.5  | 5.4  | 2.1  |
| Chemokine (C-X-C motif) ligand 10                                                     | Cxcl10   | 2.4   | 10.8  | 2.3  | 1.5  |
| Interleukin 18                                                                        | Il18     | -3.0  | -2.1  | -1.5 | -1.1 |
| Interleukin 1 alpha                                                                   | Il1a     | -2.9  | 1.0   | -1.2 | 1.2  |
| Interleukin 1 beta                                                                    | Il1b     | 1.2   | 3.5   | 1.5  | 2.0  |
| Interleukin 6                                                                         | Il6      | 1.9   | 7.3   | 1.0  | -1.1 |
| Lymphotoxin A                                                                         | Lta      | -1.2  | 1.1   | 1.0  | -1.0 |
| Macrophage migration inhibitory factor                                                | Mif      | -1.5  | -1.3  | -1.9 | -2.1 |
| Nuclear factor of kappa light polypeptide gene enhancer in B-cells 1, p105            | Nfkb1    | -1.3  | 1.5   | -1.0 | 1.2  |
| Nitric oxide synthase 2, inducible                                                    | Nos2     | 6.5   | 24.4  | 1.7  | 1.1  |
| Serine (or cysteine) peptidase inhibitor, clade E, member 1                           | Serpine1 | 50.8  | 57.3  | 4.1  | -1.0 |
| <b>DNA Damage and Repair</b>                                                          |          |       |       |      |      |
| Ataxia telangiectasia mutated homolog (human)                                         | Atm      | -1.7  | -2.4  | -1.3 | -1.0 |
| CHK2 checkpoint homolog (S. pombe)                                                    | Chek2    | -1.1  | 1.6   | 1.4  | 1.9  |
| Excision repair cross-complementing rodent repair deficiency, complementation group 1 | Ercc1    | 1.1   | 2.1   | 1.2  | -1.1 |
| Excision repair cross-complementing rodent repair deficiency, complementation group 4 | Ercc4    | -1.5  | -2.0  | -1.3 | -1.2 |
| RAD23a homolog (S. cerevisiae)                                                        | Rad23a   | -2.0  | -2.7  | -1.9 | -1.4 |
| RAD50 homolog (S. cerevisiae)                                                         | Rad50    | -1.8  | -1.5  | -1.1 | 1.0  |
| UDP glucuronosyltransferase 1 family, polypeptide A2                                  | Ugt1a2   | -2.8  | -3.1  | -2.2 | -1.9 |
| Uracil DNA glycosylase                                                                | Ung      | -1.7  | -1.4  | 1.4  | -1.1 |
| X-ray repair complementing defective repair in Chinese hamster cells 1                | Xrcc1    | -1.3  | -1.4  | -1.5 | -1.3 |
| X-ray repair complementing defective repair in Chinese hamster cells 2                | Xrcc2    | 1.4   | 1.1   | 1.1  | -1.0 |
| X-ray repair complementing defective repair in Chinese hamster cells 4                | Xrcc4    | -1.1  | -1.0  | 1.1  | 1.1  |
| <b>Apoptosis Signaling</b>                                                            |          |       |       |      |      |
| Annexin A5                                                                            | Anxa5    | 2.9   | 5.0   | 1.4  | 1.2  |
| Bcl2-associated X protein                                                             | Bax      | 1.5   | 2.3   | 1.9  | 1.9  |
| Bcl2-like 1                                                                           | Bcl2l1   | 1.7   | 2.6   | 1.4  | 1.5  |
| Caspase 1                                                                             | Casp1    | -2.4  | 1.7   | -1.1 | 1.4  |
| Caspase 8                                                                             | Casp8    | -4.3  | -1.1  | 1.0  | 1.1  |

|                                                                                     |          |      |      |      |      |
|-------------------------------------------------------------------------------------|----------|------|------|------|------|
| Fas ligand (TNF superfamily, member 6)                                              | Fasl     | -1.2 | 1.2  | 1.1  | -1.0 |
| Nuclear factor of kappa light polypeptide gene enhancer in B-cells inhibitor, alpha | Nfkbia   | -1.3 | 1.7  | -1.3 | -1.1 |
| Tumor necrosis factor receptor superfamily, member 1a                               | Tnfrsf1a | 1.1  | 1.5  | 1.7  | 1.7  |
| Tumor necrosis factor (ligand) superfamily, member 10                               | Tnfsf10  | -4.3 | -3.4 | -1.4 | -1.2 |
| TNFRSF1A-associated via death domain                                                | Tradd    | -1.6 | -1.3 | -1.1 | -1.0 |

**Table S5. Primer sequences for RT-PCR**

| Gene           | Primer sequence 5'-3'                                       | Amplicon size expected |
|----------------|-------------------------------------------------------------|------------------------|
| Oct4           | F: GACAACAATGAAAATCTTCAGGAGA<br>R: TTCTGGCGCCGGTTACAGAACCA  | 218 bp                 |
| Alb            | F: TGCTTGAATGTGCTGATGACAGGG<br>R: AAGGCAAGTCAGCAGGCATCTCATC | 161 bp                 |
| AFP            | F: TGCAGCCAAAGTGAAGAGGGAAGA<br>R: CATAGCGAGCAGCCCAAAGAAGAA  | 260 bp                 |
| CK-19          | F: ATGGCCGAGCAGAACCGGAA<br>R: CCATGAGCCGCTGGTACTCC          | 308 bp                 |
| Vim            | F: CACCTACAGCCTCTACG<br>R: AGCGGTCATTCAGCTC                 | 170 bp                 |
| $\alpha$ -SMA  | F: AGTACCCGATAGAACATGG<br>R: TTTTCTCCCGGTTGGC               | 153 bp                 |
| CYP1B1         | F: CACCAAGGCTGAGACAGTGA<br>R: GCCAGGTAAACTCCAAGCAC          | 230 bp                 |
| CYP2C9         | F: GGACAGAGACGACAAGCACA<br>R: TGGTGGGGAGAAGGTCAAT           | 200 bp                 |
| CYP3A4         | F: TGTGCCTGAGAACACCAGAG<br>R: GCAGAGGAGCCAAATCTACC          | 201 bp                 |
| CYP2E1         | F: CCGCAAGCATTTTACTACA<br>R: GCTCCTTCACCCTTTCAGAC           | 202 bp                 |
| CYP1A1         | F: AGGCTTTTACATCCCAAGG<br>R: GCAATGGTCTCACCGATAACA          | 197 bp                 |
| $\beta$ -Actin | F: TCACCACCACGGCCGAGCG<br>R: TCTCCTTCTGCATCCTGTCG           | 350 bp                 |

Abbreviations: F, Forward; R, Reverse; bp, base pair; Alb, albumin; AFP,  $\alpha$ -fetoprotein; CK-19, cytokeratin 19; Vim, vimentin;  $\alpha$ -SMA, alpha-smooth muscle actin, CYP, cytochrome P450
